# Supplementary material
Source: Springer Nature journal article supplement (https://www.springermedizin.de/resource/supplementary/13058_2006_1640_MOESM3_ESM.pdf/9699584)
Supplement: MOESM3 [file 9699584]

Significant: 377  
 Median # false significant: 0.00000

**SAM Plot**

Delta 1.56371  
 Fold Change 2.00000

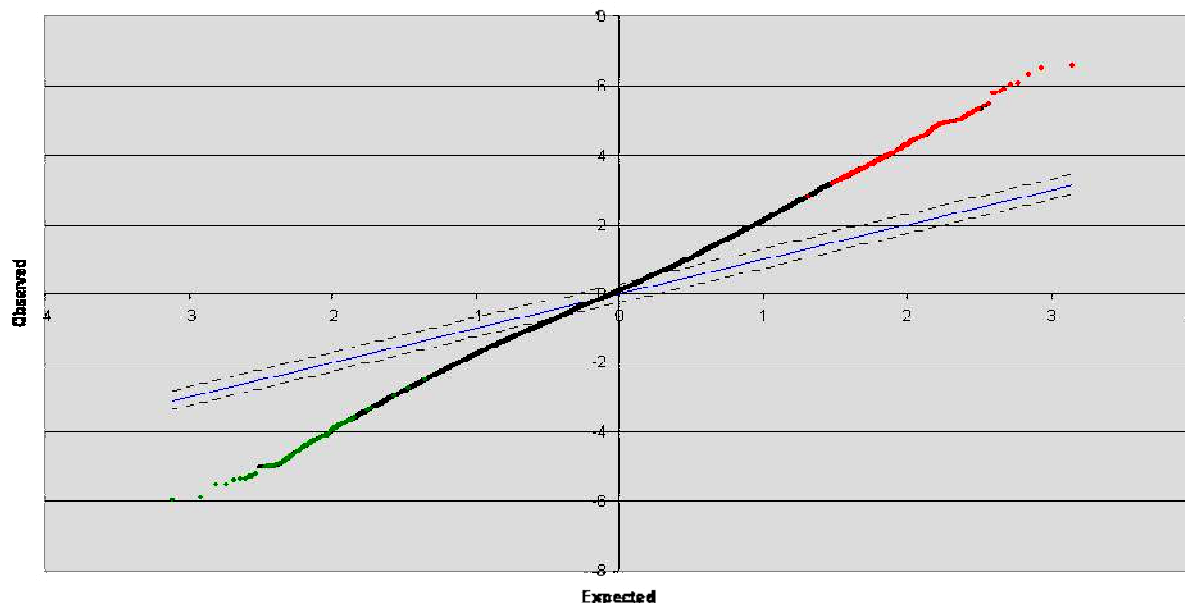

**Table S3: Genes associated with TP53 mutation status**

**242 Positive Significant Genes**

| Gene Name                                                                                          | Gene ID                       |
|----------------------------------------------------------------------------------------------------|-------------------------------|
| 118618                                                                                             | <a href="#">IMAGE:430186</a>  |
| 112817    CDCA5    cell division cycle associated 5                                                | <a href="#">IMAGE:296155</a>  |
| 120329    WDR5    WD repeat domain 5                                                               | <a href="#">IMAGE:731023</a>  |
| 310383    CENPA    centromere protein A, 17kDa                                                     | <a href="#">IMAGE:2017415</a> |
| 110227    BIRC5    baculoviral IAP repeat-containing 5 (survivin)                                  | <a href="#">IMAGE:796694</a>  |
| 117963    IBA2    ionized calcium binding adapter molecule 2                                       | <a href="#">IMAGE:178922</a>  |
| 310062    D21S2056E    DNA segment on chromosome 21 (unique) 2056 expressed sequence               | <a href="#">IMAGE:2018941</a> |
| 314040    MGC2408    hypothetical protein MGC2408                                                  | <a href="#">IMAGE:1868534</a> |
| 102750    GTPBP4    GTP binding protein 4                                                          | <a href="#">IMAGE:230235</a>  |
| 222658    HSP70-4    likely ortholog of mouse heat shock protein, 70 kDa 4                         | <a href="#">IMAGE:813999</a>  |
| 99561    CDCA8    cell division cycle associated 8                                                 | <a href="#">IMAGE:292936</a>  |
| 308729    TTK    TTK protein kinase                                                                | <a href="#">IMAGE:2062329</a> |
| 107203    LOC157378    hypothetical protein BC017881                                               | <a href="#">IMAGE:811020</a>  |
| 98784    AMD1    adenosylmethionine decarboxylase 1                                                | <a href="#">IMAGE:149013</a>  |
| 116679    SYNCRIP    synaptotagmin binding, cytoplasmic RNA interacting protein                    | <a href="#">IMAGE:753322</a>  |
| 330790    CCNB2    cyclin B2                                                                       | <a href="#">IMAGE:2457449</a> |
| 331070    SLC7A5    solute carrier family 7 (cationic amino acid transporter, y+ system), member 5 | <a href="#">IMAGE:2541203</a> |
| 111783    CDCA7    cell division cycle associated 7                                                | <a href="#">IMAGE:753198</a>  |
| 108294    LMO4    LIM domain only 4                                                                | <a href="#">IMAGE:162533</a>  |
| 223334    CCNB2    cyclin B2                                                                       | <a href="#">IMAGE:856289</a>  |
| 178439    MELK    maternal embryonic leucine zipper kinase                                         | <a href="#">IMAGE:327289</a>  |
| 117492    IFRD1    interferon-related developmental regulator 1                                    | <a href="#">IMAGE:121948</a>  |
| 115756    TK1    thymidine kinase 1, soluble                                                       | <a href="#">IMAGE:379920</a>  |
| 308749    KIFC1    kinesin family member C1                                                        | <a href="#">IMAGE:129961</a>  |

225262 || || Homo sapiens mRNA similar to RIKEN cDNA 2700049P18 gene (cDNA clone MGC:57827 IMAGE:60) [IMAGE:1035796](#)  
223867 || ARL6IP2 || ADP-ribosylation-like factor 6 interacting protein 2 [IMAGE:743987](#)  
119447 || TRIP8 || thyroid hormone receptor interactor 8 [IMAGE:773208](#)  
104988 || PFKP || phosphofructokinase, platelet [IMAGE:950682](#)  
105833 || KPNA2 || karyopherin alpha 2 (RAG cohort 1, importin alpha 1) [IMAGE:882510](#)  
330756 || LAMP3 || lysosomal-associated membrane protein 3 [IMAGE:2239304](#)  
226162 || MELK || maternal embryonic leucine zipper kinase [IMAGE:1517595](#)  
312244 || || [IMAGE:1702742](#)  
319961 || LRP11 || low density lipoprotein receptor-related protein 11 [IMAGE:1867933](#)  
313311 || MCM7 || MCM7 minichromosome maintenance deficient 7 (*S. cerevisiae*) [IMAGE:2325609](#)  
102739 || PRO2000 || PRO2000 protein [IMAGE:204483](#)  
108697 || C20orf129 || chromosome 20 open reading frame 129 [IMAGE:200402](#)  
99392 || CDC20 || CDC20 cell division cycle 20 homolog (*S. cerevisiae*) [IMAGE:898062](#)  
222270 || CDCA3 || cell division cycle associated 3 [IMAGE:743810](#)  
107438 || LOC91526 || hypothetical protein DKFZp434D2328 [IMAGE:292920](#)  
119851 || UBE2C || ubiquitin-conjugating enzyme E2C [IMAGE:769921](#)  
108023 || FLJ14502 || TRAF4 associated factor 1 [IMAGE:111812](#)  
113261 || FOXM1 || \*\*forkhead box M1 [IMAGE:564803](#)  
110859 || EIF2C2 || eukaryotic translation initiation factor 2C, 2 [IMAGE:129840](#)  
228997 || NUSAP1 || nucleolar and spindle associated protein 1 [IMAGE:2327739](#)  
106519 || NDRG1 || N-myc downstream regulated gene 1 [IMAGE:842863](#)  
98779 || ATP6V1C2 || ATPase, H+ transporting, lysosomal 42kDa, V1 subunit C isoform 2 [IMAGE:123627](#)  
223871 || UBE2C || ubiquitin-conjugating enzyme E2C [IMAGE:146882](#)  
101932 || NP || nucleoside phosphorylase [IMAGE:769890](#)  
116712 || C10orf3 || chromosome 10 open reading frame 3 [IMAGE:504308](#)  
115397 || CENPF || centromere protein F, 350/400ka (mitosis) [IMAGE:435076](#)  
103893 || AMD1 || adenosylmethionine decarboxylase 1 [IMAGE:825842](#)  
105550 || IMPA2 || inositol(myo)-1(or 4)-monophosphatase 2 [IMAGE:32299](#)  
310652 || DKFZp762E1312 || hypothetical protein DKFZp762E1312 [IMAGE:1540236](#)  
111977 || FLJ10156 || hypothetical protein FLJ10156 [IMAGE:773147](#)  
112622 || LGN || LGN protein [IMAGE:415264](#)  
223443 || FLJ10407 || hypothetical protein FLJ10407 [IMAGE:824126](#)  
225799 || HAPIP || huntingtin-associated protein interacting protein (duo) [IMAGE:971279](#)  
310388 || TPX2 || TPX2, microtubule-associated protein homolog (*Xenopus laevis*) [IMAGE:1540227](#)  
108149 || EZH2 || enhancer of zeste homolog 2 (*Drosophila*) [IMAGE:770992](#)  
108920 || ANAPC7 || anaphase-promoting complex subunit 7 [IMAGE:788256](#)  
108090 || PRO2000 || PRO2000 protein [IMAGE:280375](#)  
224310 || PKP1 || plakophilin 1 (ectodermal dysplasia/skin fragility syndrome) [IMAGE:399577](#)  
109251 || RRM2 || ribonucleotide reductase M2 polypeptide [IMAGE:624627](#)  
111792 || PLK || polo-like kinase (*Drosophila*) [IMAGE:744047](#)  
222476 || || Homo sapiens, clone IMAGE:5736845, mRNA [IMAGE:449112](#)  
98808 || || Homo sapiens cDNA clone IMAGE:4448513, partial cds [IMAGE:418279](#)  
225985 || CLIC4 || chloride intracellular channel 4 [IMAGE:448085](#)  
109732 || RAD51 || RAD51 homolog (RecA homolog, *E. coli*) (*S. cerevisiae*) [IMAGE:1476053](#)  
331258 || EVA1 || epithelial V-like antigen 1 [IMAGE:453112](#)  
224459 || PSAT1 || phosphoserine aminotransferase 1 [IMAGE:1636108](#)  
105293 || RTP801 || HIF-1 responsive RTP801 [IMAGE:221707](#)  
320000 || BCL11A || B-cell CLL/lymphoma 11A (zinc finger protein) [IMAGE:1584563](#)  
115359 || SHAPY || \*\*Ca<sup>2+</sup>-dependent endoplasmic reticulum nucleoside diphosphatase [IMAGE:257011](#)  
308722 || FLJ25416 || hypothetical protein FLJ25416 [IMAGE:1618978](#)  
118420 || TRIM2 || tripartite motif-containing 2 [IMAGE:838899](#)

220935 || PRKX || protein kinase, X-linked [IMAGE:1638550](#)  
100967 || KCNN4 || potassium intermediate/small conductance calcium-activated channel, subfamily N, member 4 [IMAGE:756708](#)  
224556 || UBQLN1 || ubiquilin 1 [IMAGE:824719](#)  
104095 || MYBL2 || v-myb myeloblastosis viral oncogene homolog (avian)-like 2 [IMAGE:815526](#)  
223936 || PLEKHG1 || pleckstrin homology domain containing, family G (with RhoGef domain) member 1 [IMAGE:298021](#)  
223533 || FLJ20989 || hypothetical protein FLJ20989 [IMAGE:430549](#)  
108164 || KIFC1 || kinesin family member C1 [IMAGE:292933](#)  
221572 || HMGB3 || high-mobility group box 3 [IMAGE:878640](#)  
99680 || LOC89958 || hypothetical protein LOC89958 [IMAGE:511096](#)  
162324 || || Homo sapiens transcribed sequences [IMAGE:712292](#)  
109438 || SLC7A5 || solute carrier family 7 (cationic amino acid transporter, y+ system), member 5 [IMAGE:755578](#)  
104234 || SEPHS1 || selenophosphate synthetase 1 [IMAGE:840702](#)  
107752 || CDC42EP1 || CDC42 effector protein (Rho GTPase binding) 1 [IMAGE:214982](#)  
310078 || MGC5528 || defective in sister chromatid cohesion homolog 1 (S. cerevisiae) [IMAGE:1394099](#)  
221272 || EVA1 || epithelial V-like antigen 1 [IMAGE:233464](#)  
224655 || || Homo sapiens cDNA FLJ16029 fis, clone KIDNE2012945, weakly similar to PROCOLLAGEN C-PROT [IMAGE:259884](#)  
109369 || CDC25B || cell division cycle 25B [IMAGE:48398](#)  
100181 || CTL2 || CTL2 gene [IMAGE:137581](#)  
102735 || B3GNT5 || UDP-GlcNAc:betaGal beta-1,3-N-acetylglucosaminyltransferase 5 [IMAGE:487722](#)  
117977 || CXCL10 || chemokine (C-X-C motif) ligand 10 [IMAGE:1493160](#)  
308875 || ATP1B3 || ATPase, Na+/K+ transporting, beta 3 polypeptide [IMAGE:136722](#)  
114193 || AFAP || actin filament associated protein [IMAGE:1084673](#)  
119785 || SDC1 || syndecan 1 [IMAGE:525926](#)  
118458 || FTHFSDC1 || formyltetrahydrofolate synthetase domain containing 1 [IMAGE:767068](#)  
105847 || || Homo sapiens ubiquitin-conjugating enzyme E2E 3 (UBC4/5 homolog, yeast), mRNA (cDNA clone IM/ [IMAGE:795809](#)  
316641 || KPNA2 || karyopherin alpha 2 (RAG cohort 1, importin alpha 1) [IMAGE:824962](#)  
307638 || ANLN || anillin, actin binding protein (scraps homolog, Drosophila) [IMAGE:128711](#)  
115648 || ARL6IP2 || ADP-ribosylation-like factor 6 interacting protein 2 [IMAGE:220395](#)  
98982 || STK6 || serine/threonine kinase 6 [IMAGE:129865](#)  
118920 || PROM1 || prominin 1 [IMAGE:27544](#)  
223279 || TRPV4 || transient receptor potential cation channel, subfamily V, member 4 [IMAGE:379598](#)  
115701 || WARS || tryptophanyl-tRNA synthetase [IMAGE:855786](#)  
101019 || CDC42EP1 || CDC42 effector protein (Rho GTPase binding) 1 [IMAGE:159462](#)  
310126 || EIF2C2 || eukaryotic translation initiation factor 2C, 2 [IMAGE:110568](#)  
105624 || LY6E || lymphocyte antigen 6 complex, locus E [IMAGE:1470048](#)  
222483 || SLC2A1 || solute carrier family 2 (facilitated glucose transporter), member 1 [IMAGE:25389](#)  
120627 || RNF24 || ring finger protein 24 [IMAGE:47169](#)  
245567 || || [IMAGE:132711](#)  
102564 || RTP801 || HIF-1 responsive RTP801 [IMAGE:813645](#)  
109841 || PCDH7 || BH-protocadherin (brain-heart) [IMAGE:753028](#)  
330735 || UGT8 || UDP glycosyltransferase 8 (UDP-galactose ceramide galactosyltransferase) [IMAGE:2470840](#)  
312550 || RAD54B || RAD54B homolog [IMAGE:1586472](#)  
100489 || || [IMAGE:769857](#)  
105705 || LRP8 || low density lipoprotein receptor-related protein 8, apolipoprotein e receptor [IMAGE:415554](#)  
109648 || NFIB || nuclear factor I/B [IMAGE:416959](#)  
113746 || TFAP2C || transcription factor AP-2 gamma (activating enhancer binding protein 2 gamma) [IMAGE:725680](#)  
318862 || LMO4 || LIM domain only 4 [IMAGE:1706027](#)  
330614 || RASAL1 || RAS protein activator like 1 (GAP1 like) [IMAGE:2365853](#)  
223034 || KIAA1228 || KIAA1228 protein [IMAGE:824201](#)  
109924 || GPRC5B || G protein-coupled receptor, family C, group 5, member B [IMAGE:321580](#)  
105351 || PRKY || protein kinase, Y-linked [IMAGE:310034](#)

|                                                                                                                      |                               |
|----------------------------------------------------------------------------------------------------------------------|-------------------------------|
| 98765    DLX5    distal-less homeo box 5                                                                             | <a href="#">IMAGE:299600</a>  |
| 222979    ZBED4    zinc finger, BED domain containing 4                                                              | <a href="#">IMAGE:827165</a>  |
| 119100    CCNA2    cyclin A2                                                                                         | <a href="#">IMAGE:950690</a>  |
| 311090    KIAA1833    hypothetical protein KIAA1833                                                                  | <a href="#">IMAGE:1877561</a> |
| 331271    IRAK1    interleukin-1 receptor-associated kinase 1                                                        | <a href="#">IMAGE:2566158</a> |
| 225703    MGC50844    hypothetical protein MGC50844                                                                  | <a href="#">IMAGE:281597</a>  |
| 99275    IRAK1    interleukin-1 receptor-associated kinase 1                                                         | <a href="#">IMAGE:379200</a>  |
| 223440    MYO10    myosin X                                                                                          | <a href="#">IMAGE:460646</a>  |
| 309074    GZMB    granzyme B (granzyme 2, cytotoxic T-lymphocyte-associated serine esterase 1)                       | <a href="#">IMAGE:1757321</a> |
| 309699    EGFR    epidermal growth factor receptor (erythroblastic leukemia viral (v-erb-b) oncogene homolog, avian) | <a href="#">IMAGE:241197</a>  |
| 109366    CDC25B    cell division cycle 25B                                                                          | <a href="#">IMAGE:786067</a>  |
| 113314    NFIB    nuclear factor I/B                                                                                 | <a href="#">IMAGE:813265</a>  |
| 310030    RISC    likely homolog of rat and mouse retinoid-inducible serine carboxypeptidase                         | <a href="#">IMAGE:1519143</a> |
| 310361    DAPK1    death-associated protein kinase 1                                                                 | <a href="#">IMAGE:2043415</a> |
| 111855    KIAA1357    KIAA1357 protein                                                                               | <a href="#">IMAGE:415766</a>  |
| 225684    NFIB    nuclear factor I/B                                                                                 | <a href="#">IMAGE:868078</a>  |
| 117608    GABRP    gamma-aminobutyric acid (GABA) A receptor, pi                                                     | <a href="#">IMAGE:563598</a>  |
| 110565       Homo sapiens hypothetical LOC150371 (LOC150371), mRNA                                                   | <a href="#">IMAGE:155532</a>  |
| 107474    ZBED4    zinc finger, BED domain containing 4                                                              | <a href="#">IMAGE:282561</a>  |
| 330591    SLC2A1    solute carrier family 2 (facilitated glucose transporter), member 1                              | <a href="#">IMAGE:2547341</a> |
| 102224    DAPK1    death-associated protein kinase 1                                                                 | <a href="#">IMAGE:364934</a>  |
| 112578    PARD3    par-3 partitioning defective 3 homolog (C. elegans)                                               | <a href="#">IMAGE:127099</a>  |
| 330535    NEK2    NIMA (never in mitosis gene a)-related kinase 2                                                    | <a href="#">IMAGE:2301826</a> |
| 115306       Homo sapiens transcribed sequence with weak similarity to protein sp:P39190 (H.sapiens) ALU3_HUM        | <a href="#">IMAGE:489931</a>  |
| 309810       Homo sapiens clone P2-32 anti-oxidized LDL immunoglobulin light chain Fab mRNA, partial cds             | <a href="#">IMAGE:1909455</a> |
| 308662    PRKX    protein kinase, X-linked                                                                           | <a href="#">IMAGE:1869486</a> |
| 117053       Homo sapiens clone ASPBLL54 immunoglobulin lambda light chain VJ region mRNA, partial cds               | <a href="#">IMAGE:236124</a>  |
| 108180    ISG20    interferon stimulated gene 20kDa                                                                  | <a href="#">IMAGE:491751</a>  |
| 311256    DHCR7    7-dehydrocholesterol reductase                                                                    | <a href="#">IMAGE:2310272</a> |
| 222257    GPR51    G protein-coupled receptor 51                                                                     | <a href="#">IMAGE:878097</a>  |
| 116165       Homo sapiens cDNA FLJ26905 fis, clone RCT01427, highly similar to Ig lambda chain C regions             | <a href="#">IMAGE:66560</a>   |
| 224925    GYLTL1B    glycosyltransferase-like 1B                                                                     | <a href="#">IMAGE:703810</a>  |
| 104172    FOXC1    forkhead box C1                                                                                   | <a href="#">IMAGE:253733</a>  |
| 100532    TNFSF10    tumor necrosis factor (ligand) superfamily, member 10                                           | <a href="#">IMAGE:183811</a>  |
| 111258    LAD1    ladinin 1                                                                                          | <a href="#">IMAGE:121551</a>  |
| 104346    PLCB4    phospholipase C, beta 4                                                                           | <a href="#">IMAGE:1521297</a> |
| 223403    PERP    PERP, TP53 apoptosis effector                                                                      | <a href="#">IMAGE:378365</a>  |
| 225963    KIAA1750    KIAA1750 protein                                                                               | <a href="#">IMAGE:745011</a>  |
| 226173    SGCD    sarcoglycan, delta (35kDa dystrophin-associated glycoprotein)                                      | <a href="#">IMAGE:469898</a>  |
| 100104    KLK10    kallikrein 10                                                                                     | <a href="#">IMAGE:810960</a>  |
| 114105    IGLL1    immunoglobulin lambda-like polypeptide 1                                                          | <a href="#">IMAGE:344134</a>  |
| 107949    GALNT3    UDP-N-acetyl-alpha-D-galactosamine:polypeptide N-acetylgalactosaminyltransferase 3 (GalN         | <a href="#">IMAGE:148225</a>  |
| 102603    MAD2L1    MAD2 mitotic arrest deficient-like 1 (yeast)                                                     | <a href="#">IMAGE:814701</a>  |
| 102357    MID1    midline 1 (Opitz/BBB syndrome)                                                                     | <a href="#">IMAGE:897865</a>  |
| 161326    TYRO3    TYRO3 protein tyrosine kinase                                                                     | <a href="#">IMAGE:343821</a>  |
| 108202    SFRS1    splicing factor, arginine/serine-rich 1 (splicing factor 2, alternate splicing factor)            | <a href="#">IMAGE:813310</a>  |
| 102645    SLC2A1    solute carrier family 2 (facilitated glucose transporter), member 1                              | <a href="#">IMAGE:207358</a>  |
| 105534    NEK2    NIMA (never in mitosis gene a)-related kinase 2                                                    | <a href="#">IMAGE:462926</a>  |
| 113361    NFIB    nuclear factor I/B                                                                                 | <a href="#">IMAGE:245860</a>  |
| 99387    HN1    hematological and neurological expressed 1                                                           | <a href="#">IMAGE:795803</a>  |
| 108541    NSE1    NSE1                                                                                               | <a href="#">IMAGE:838668</a>  |

|                                                                                                                       |                               |
|-----------------------------------------------------------------------------------------------------------------------|-------------------------------|
| 115237    KLK6    kallikrein 6 (neurosin, zyme)                                                                       | <a href="#">IMAGE:809784</a>  |
| 223615    PRKX    protein kinase, X-linked                                                                            | <a href="#">IMAGE:1032170</a> |
| 314209    NDRG1    N-myc downstream regulated gene 1                                                                  | <a href="#">IMAGE:1917716</a> |
| 101882    VGLL1    vestigial like 1 (Drosophila)                                                                      | <a href="#">IMAGE:460666</a>  |
| 117599       Homo sapiens cDNA FLJ26252 fis, clone DMC03335                                                           | <a href="#">IMAGE:813286</a>  |
| 314293    GALNT3    UDP-N-acetyl-alpha-D-galactosamine:polypeptide N-acetylgalactosaminyltransferase 3 (GalN          | <a href="#">IMAGE:328542</a>  |
| 330761    LBR    lamin B receptor                                                                                     | <a href="#">IMAGE:2544309</a> |
| 116416       **Homo sapiens cDNA clone MGC:62026 IMAGE:6450688, complete cds                                          | <a href="#">IMAGE:154809</a>  |
| 309065       Homo sapiens transcribed sequence with weak similarity to protein ref:NP_060312.1 (H.sapiens) hypo       | <a href="#">IMAGE:51763</a>   |
| 106141    RDH10    retinol dehydrogenase 10 (all-trans)                                                               | <a href="#">IMAGE:1031919</a> |
| 101119    KCNK1    potassium channel, subfamily K, member 1                                                           | <a href="#">IMAGE:288896</a>  |
| 114028    MYC    v-myc myelocytomatosis viral oncogene homolog (avian)                                                | <a href="#">IMAGE:812965</a>  |
| 221131    NFIB    nuclear factor I/B                                                                                  | <a href="#">IMAGE:855244</a>  |
| 223111    KRT6B    keratin 6B                                                                                         | <a href="#">IMAGE:1486118</a> |
| 102349    TGFA    transforming growth factor, alpha                                                                   | <a href="#">IMAGE:325822</a>  |
| 330579    BMP7    bone morphogenetic protein 7 (osteogenic protein 1)                                                 | <a href="#">IMAGE:2440877</a> |
| 105113    OL-64    visceral adipose-specific SERPIN                                                                   | <a href="#">IMAGE:813414</a>  |
| 317229    KIAA1579    hypothetical protein FLJ10770                                                                   | <a href="#">IMAGE:1658257</a> |
| 113465    PPP1R14C    protein phosphatase 1, regulatory (inhibitor) subunit 14C                                       | <a href="#">IMAGE:32516</a>   |
| 106773       Homo sapiens cDNA clone MGC:62026 IMAGE:6450688, complete cds                                            | <a href="#">IMAGE:80796</a>   |
| 108507    YWHAZ    tyrosine 3-monooxygenase/tryptophan 5-monooxygenase activation protein, zeta polypeptide           | <a href="#">IMAGE:811166</a>  |
| 115107    ATP2B4    ATPase, Ca <sup>++</sup> transporting, plasma membrane 4                                          | <a href="#">IMAGE:502326</a>  |
| 220876    TGFA    transforming growth factor, alpha                                                                   | <a href="#">IMAGE:1553998</a> |
| 118594    P2RY6    pyrimidinergic receptor P2Y, G-protein coupled, 6                                                  | <a href="#">IMAGE:452588</a>  |
| 307803    MDA5    melanoma differentiation associated protein-5                                                       | <a href="#">IMAGE:1520357</a> |
| 118457    TAP1    transporter 1, ATP-binding cassette, sub-family B (MDR/TAP)                                         | <a href="#">IMAGE:841340</a>  |
| 331261    GPR51    G protein-coupled receptor 51                                                                      | <a href="#">IMAGE:2516756</a> |
| 100368    GBP1    guanylate binding protein 1, interferon-inducible, 67kDa                                            | <a href="#">IMAGE:841008</a>  |
| 101953    MYC    v-myc myelocytomatosis viral oncogene homolog (avian)                                                | <a href="#">IMAGE:417226</a>  |
| 108089    RPL26L1    **ribosomal protein L26-like 1                                                                   | <a href="#">IMAGE:358673</a>  |
| 118642    KHDRBS3    KH domain containing, RNA binding, signal transduction associated 3                              | <a href="#">IMAGE:813151</a>  |
| 102632    ACY1L2    aminoacylase 1-like 2                                                                             | <a href="#">IMAGE:137139</a>  |
| 104297    FLJ10901    hypothetical protein FLJ10901                                                                   | <a href="#">IMAGE:594684</a>  |
| 105262    TP53BP2    tumor protein p53 binding protein, 2                                                             | <a href="#">IMAGE:212198</a>  |
| 311144       Homo sapiens similar to nanos (LOC375939), mRNA                                                          | <a href="#">IMAGE:1897178</a> |
| 116724    MDA5    melanoma differentiation associated protein-5                                                       | <a href="#">IMAGE:158184</a>  |
| 115463    SERPINE2    serine (or cysteine) proteinase inhibitor, clade E (nexin, plasminogen activator inhibitor type | <a href="#">IMAGE:246722</a>  |
| 109528    RARRES1    retinoic acid receptor responder (tazarotene induced) 1                                          | <a href="#">IMAGE:309583</a>  |
| 307267    IL12RB2    interleukin 12 receptor, beta 2                                                                  | <a href="#">IMAGE:1587390</a> |
| 120223    FOXC1    forkhead box C1                                                                                    | <a href="#">IMAGE:358885</a>  |
| 226855    RGMA    repulsive guidance molecule A                                                                       | <a href="#">IMAGE:743829</a>  |
| 220621    HUCEP11    cerebral protein 11                                                                              | <a href="#">IMAGE:454632</a>  |
| 99435    EGFR    epidermal growth factor receptor (erythroblastic leukemia viral (v-erb-b) oncogene homolog, avian    | <a href="#">IMAGE:324861</a>  |
| 99955    DKFZp434C0631    hypothetical protein DKFZp434C0631                                                          | <a href="#">IMAGE:950355</a>  |
| 224041       Homo sapiens mRNA; cDNA DKFZp761D1624 (from clone DKFZp761D1624)                                         | <a href="#">IMAGE:460618</a>  |
| 114642    EGFR    epidermal growth factor receptor (erythroblastic leukemia viral (v-erb-b) oncogene homolog, avian   | <a href="#">IMAGE:669485</a>  |
| 107390    YWHAZ    tyrosine 3-monooxygenase/tryptophan 5-monooxygenase activation protein, zeta polypeptide           | <a href="#">IMAGE:1031744</a> |
| 330846    KRT5    keratin 5 (epidermolysis bullosa simplex, Dowling-Meara/Kobner/Weber-Cockayne types)                | <a href="#">IMAGE:2578894</a> |
| 239268    RUNX3    runt-related transcription factor 3                                                                | <a href="#">IMAGE:358842</a>  |
| 120801       Homo sapiens transcribed sequence with strong similarity to protein pir:A25074 (H.sapiens) A25074 vi     | <a href="#">IMAGE:49532</a>   |
| 111191    SPOCK2    sparco/osteonectin, cwcv and kazal-like domains proteoglycan (testican) 2                         | <a href="#">IMAGE:726678</a>  |

|                                                                                                                |                               |
|----------------------------------------------------------------------------------------------------------------|-------------------------------|
| 104251    CDK7    cyclin-dependent kinase 7 (MO15 homolog, Xenopus laevis, cdk-activating kinase)              | <a href="#">IMAGE:470621</a>  |
| 114892    ART3    ADP-ribosyltransferase 3                                                                     | <a href="#">IMAGE:1468263</a> |
| 104849    GGH    gamma-glutamyl hydrolase (conjugase, folylpolygammaglutamyl hydrolase)                        | <a href="#">IMAGE:809588</a>  |
| 100448    REG4    **regenerating islet-derived family, member 4                                                | <a href="#">IMAGE:951449</a>  |
| 118765    EPB41L4B    erythrocyte membrane protein band 4.1 like 4B                                            | <a href="#">IMAGE:210698</a>  |
| 105509    LOC129607    hypothetical protein LOC129607                                                          | <a href="#">IMAGE:207838</a>  |
| 318210       Homo sapiens transcribed sequence with strong similarity to protein sp:O60269 (H.sapiens) Y514_HU | <a href="#">IMAGE:1710068</a> |
| 99938    PHC2    polyhomeotic-like 2 (Drosophila)                                                              | <a href="#">IMAGE:898328</a>  |
| 101469    DKK1    dickkopf homolog 1 (Xenopus laevis)                                                          | <a href="#">IMAGE:669375</a>  |
| 110771    cig5    viperin                                                                                      | <a href="#">IMAGE:120600</a>  |
| 105919    SAMD6    sterile alpha motif domain containing 6                                                     | <a href="#">IMAGE:744632</a>  |
| 102719    UGT8    UDP glycosyltransferase 8 (UDP-galactose ceramide galactosyltransferase)                     | <a href="#">IMAGE:254328</a>  |
| 105839    RUNX3    runt-related transcription factor 3                                                         | <a href="#">IMAGE:291478</a>  |
| 107602    TRIM29    tripartite motif-containing 29                                                             | <a href="#">IMAGE:377275</a>  |

### 135 Negative Significant Genes

| Gene Name                                                                                    | Gene ID                       |
|----------------------------------------------------------------------------------------------|-------------------------------|
| 120339    IRS1    insulin receptor substrate 1                                               | <a href="#">IMAGE:796284</a>  |
| 98838    ESR1    estrogen receptor 1                                                         | <a href="#">IMAGE:725321</a>  |
| 115462    DNALI1    dynein, axonemal, light intermediate polypeptide 1                       | <a href="#">IMAGE:782688</a>  |
| 111103    NAT1    N-acetyltransferase 1 (arylamine N-acetyltransferase)                      | <a href="#">IMAGE:66599</a>   |
| 330362    FLJ20151    hypothetical protein FLJ20151                                          | <a href="#">IMAGE:2494168</a> |
| 110751    TENC1    tensin like C1 domain-containing phosphatase                              | <a href="#">IMAGE:813603</a>  |
| 105917       Human clone 23948 mRNA sequence                                                 | <a href="#">IMAGE:49567</a>   |
| 314918    KIAA0882    KIAA0882 protein                                                       | <a href="#">IMAGE:2284924</a> |
| 103054    FLJ13710    hypothetical protein FLJ13710                                          | <a href="#">IMAGE:490965</a>  |
| 114369    DACH    dachshund homolog (Drosophila)                                             | <a href="#">IMAGE:52021</a>   |
| 314597       Homo sapiens transcribed sequences                                              | <a href="#">IMAGE:1558233</a> |
| 107403    QDPR    quinoid dihydropteridine reductase                                         | <a href="#">IMAGE:23776</a>   |
| 117657    BC008967    hypothetical gene BC008967                                             | <a href="#">IMAGE:782497</a>  |
| 221236       **Homo sapiens LOC375816 (LOC375816), mRNA                                      | <a href="#">IMAGE:470227</a>  |
| 220332    DKFZp434L142    hypothetical protein DKFZp434L142                                  | <a href="#">IMAGE:823655</a>  |
| 115623    HSA250839    gene for serine/threonine protein kinase                              | <a href="#">IMAGE:344959</a>  |
| 115160    SCUBE2    signal peptide, CUB domain, EGF-like 2                                   | <a href="#">IMAGE:1132490</a> |
| 112813    ITPR1    inositol 1,4,5-triphosphate receptor, type 1                              | <a href="#">IMAGE:471725</a>  |
| 108855    FLJ20151    **hypothetical protein FLJ20151                                        | <a href="#">IMAGE:594633</a>  |
| 309686                                                                                       | <a href="#">IMAGE:683569</a>  |
| 116862    MAPT    microtubule-associated protein tau                                         | <a href="#">IMAGE:647397</a>  |
| 111780    BCMP11    breast cancer membrane protein 11                                        | <a href="#">IMAGE:841621</a>  |
| 109111    BCMP11    breast cancer membrane protein 11                                        | <a href="#">IMAGE:119982</a>  |
| 117547    RAI2    retinoic acid induced 2                                                    | <a href="#">IMAGE:501868</a>  |
| 220895    FLJ11155    hypothetical protein FLJ11155                                          | <a href="#">IMAGE:288770</a>  |
| 178406    GATA3    GATA binding protein 3                                                    | <a href="#">IMAGE:365681</a>  |
| 110271    LPXN    leupaxin                                                                   | <a href="#">IMAGE:325128</a>  |
| 224276    MLPH    melanophilin                                                               | <a href="#">IMAGE:1558642</a> |
| 118673       Homo sapiens transcribed sequences                                              | <a href="#">IMAGE:782972</a>  |
| 220479                                                                                       | <a href="#">IMAGE:399463</a>  |
| 319994    MAGED2    melanoma antigen, family D, 2                                            | <a href="#">IMAGE:2316397</a> |
| 330354    TFF1    trefoil factor 1 (breast cancer, estrogen-inducible sequence expressed in) | <a href="#">IMAGE:2504927</a> |
| 99416       Homo sapiens transcribed sequences                                               | <a href="#">IMAGE:773443</a>  |
| 226434       Homo sapiens cDNA FLJ12924 fis, clone NT2RP2004709.                             | <a href="#">IMAGE:279655</a>  |

|                                                                                                                 |                               |
|-----------------------------------------------------------------------------------------------------------------|-------------------------------|
| 109952    FLJ10724    melanoma antigen recognized by T cells 2                                                  | <a href="#">IMAGE:359855</a>  |
| 222802       Homo sapiens transcribed sequences                                                                 | <a href="#">IMAGE:431988</a>  |
| 107393    INPP4B    inositol polyphosphate-4-phosphatase, type II, 105kDa                                       | <a href="#">IMAGE:165857</a>  |
| 222583    SYTL2    synaptotagmin-like 2                                                                         | <a href="#">IMAGE:826194</a>  |
| 224553    CHAD    chondroadherin                                                                                | <a href="#">IMAGE:1507713</a> |
| 225396       Homo sapiens cDNA FLJ26764 fis, clone PRS02668                                                     | <a href="#">IMAGE:289505</a>  |
| 104494       Homo sapiens cDNA FLJ41270 fis, clone BRAMY2036387                                                 | <a href="#">IMAGE:153617</a>  |
| 116130    IRS1    insulin receptor substrate 1                                                                  | <a href="#">IMAGE:322005</a>  |
| 106777    ATP7B    ATPase, Cu++ transporting, beta polypeptide (Wilson disease)                                 | <a href="#">IMAGE:266312</a>  |
| 120064    FOXA1    forkhead box A1                                                                              | <a href="#">IMAGE:954694</a>  |
| 109865    GPA33    glycoprotein A33 (transmembrane)                                                             | <a href="#">IMAGE:1144652</a> |
| 105196    SLC7A2    solute carrier family 7 (cationic amino acid transporter, y+ system), member 2              | <a href="#">IMAGE:132140</a>  |
| 107435    KIF12    kinesin family member 12                                                                     | <a href="#">IMAGE:214205</a>  |
| 101265       Homo sapiens mRNA; cDNA DKFZp686A0815 (from clone DKFZp686A0815)                                   | <a href="#">IMAGE:504959</a>  |
| 98909    ADCY1    adenylate cyclase 1 (brain)                                                                   | <a href="#">IMAGE:42389</a>   |
| 309894    LASP1    LIM and SH3 protein 1                                                                        | <a href="#">IMAGE:1631663</a> |
| 433331       *mitoch. cont. cytochrome P450, subfamily IIB (phenobarbital-inducible), polypeptide 6             | <a href="#">IMAGE:182295</a>  |
| 117581    FOXA1    forkhead box A1                                                                              | <a href="#">IMAGE:1211831</a> |
| 116272    CYBRD1    cytochrome b reductase 1                                                                    | <a href="#">IMAGE:838446</a>  |
| 120709    LAF4    lymphoid nuclear protein related to AF4                                                       | <a href="#">IMAGE:51185</a>   |
| 118640    DACH    dachshund homolog (Drosophila)                                                                | <a href="#">IMAGE:29967</a>   |
| 226202    FLJ11280    **hypothetical protein FLJ11280                                                           | <a href="#">IMAGE:239568</a>  |
| 111946    CACNA2D2    calcium channel, voltage-dependent, alpha 2/delta subunit 2                               | <a href="#">IMAGE:284160</a>  |
| 101948    INPP4B    **inositol polyphosphate-4-phosphatase, type II, 105kDa                                     | <a href="#">IMAGE:813513</a>  |
| 221455    NOSTRIN    nitric oxide synthase trafficker                                                           | <a href="#">IMAGE:854763</a>  |
| 310822    IL6ST    interleukin 6 signal transducer (gp130, oncostatin M receptor)                               | <a href="#">IMAGE:2018581</a> |
| 226316    PREX1    phosphatidylinositol 3,4,5-trisphosphate-dependent RAC exchanger 1                           | <a href="#">IMAGE:825270</a>  |
| 330779    RABEP1    rabaptin, RAB GTPase binding effector protein 1                                             | <a href="#">IMAGE:2545220</a> |
| 98862    ELOVL2    elongation of very long chain fatty acids (FEN1/Elo2, SUR4/Elo3, yeast)-like 2               | <a href="#">IMAGE:44387</a>   |
| 330909    RGS5    regulator of G-protein signalling 5                                                           | <a href="#">IMAGE:2569701</a> |
| 119997    FMO5    flavin containing monooxygenase 5                                                             | <a href="#">IMAGE:197525</a>  |
| 220269                                                                                                          | <a href="#">IMAGE:279837</a>  |
| 110212    NAT1    N-acetyltransferase 1 (arylamine N-acetyltransferase)                                         | <a href="#">IMAGE:195525</a>  |
| 118440    MGC24047    hypothetical protein MGC24047                                                             | <a href="#">IMAGE:155072</a>  |
| 115654    SCUBE2    signal peptide, CUB domain, EGF-like 2                                                      | <a href="#">IMAGE:916834</a>  |
| 102229       Homo sapiens transcribed sequence with weak similarity to protein ref:NP_060312.1 (H.sapiens) hypo | <a href="#">IMAGE:1056516</a> |
| 223683    MAN2C1    **mannosidase, alpha, class 2C, member 1                                                    | <a href="#">IMAGE:415610</a>  |
| 101559       Homo sapiens transcribed sequences                                                                 | <a href="#">IMAGE:79807</a>   |
| 310254    RAMP2    receptor (calcitonin) activity modifying protein 2                                           | <a href="#">IMAGE:379604</a>  |
| 103753    RABEP1    rabaptin, RAB GTPase binding effector protein 1                                             | <a href="#">IMAGE:772890</a>  |
| 110792    C14orf45    chromosome 14 open reading frame 45                                                       | <a href="#">IMAGE:795744</a>  |
| 315513    SCUBE2    signal peptide, CUB domain, EGF-like 2                                                      | <a href="#">IMAGE:1691237</a> |
| 330411    C4A    complement component 4A                                                                        | <a href="#">IMAGE:2559389</a> |
| 307599    HOXB4    homeo box B4                                                                                 | <a href="#">IMAGE:1534155</a> |
| 113997    DCAMKL1    doublecortin and CaM kinase-like 1                                                         | <a href="#">IMAGE:277423</a>  |
| 102455    ASAH1    N-acylsphingosine amidohydrolase (acid ceramidase) 1                                         | <a href="#">IMAGE:855487</a>  |
| 105889       Homo sapiens transcribed sequence with weak similarity to protein pir:A35363 (H.sapiens) A35363 sy | <a href="#">IMAGE:124315</a>  |
| 116003    GREB1    GREB1 protein                                                                                | <a href="#">IMAGE:299332</a>  |
| 101009    SCGB2A2    secretoglobin, family 2A, member 2                                                         | <a href="#">IMAGE:964748</a>  |
| 108183                                                                                                          | <a href="#">IMAGE:1191183</a> |
| 99032                                                                                                           | <a href="#">IMAGE:84786</a>   |

|                                                                                                                   |                               |
|-------------------------------------------------------------------------------------------------------------------|-------------------------------|
| 330499    LOH11CR2A    loss of heterozygosity, 11, chromosomal region 2, gene A                                   | <a href="#">IMAGE:2502722</a> |
| 223489    CLIC6    chloride intracellular channel 6                                                               | <a href="#">IMAGE:854831</a>  |
| 114720    LRP2    low density lipoprotein-related protein 2                                                       | <a href="#">IMAGE:143846</a>  |
| 220510    MGC18216    hypothetical protein MGC18216                                                               | <a href="#">IMAGE:428184</a>  |
| 223020    FLJ23153    likely ortholog of mouse tumor necrosis-alpha-induced adipose-related protein               | <a href="#">IMAGE:80050</a>   |
| 108584    FLJ11280    **hypothetical protein FLJ11280                                                             | <a href="#">IMAGE:245341</a>  |
| 98724       Homo sapiens cDNA FLJ26212 fis, clone ADG07859                                                        | <a href="#">IMAGE:204684</a>  |
| 100769    LRP2    low density lipoprotein-related protein 2                                                       | <a href="#">IMAGE:183773</a>  |
| 112348    ACADSB    acyl-Coenzyme A dehydrogenase, short/branched chain                                           | <a href="#">IMAGE:243100</a>  |
| 99429       Homo sapiens transcribed sequences                                                                    | <a href="#">IMAGE:358314</a>  |
| 221066       Homo sapiens transcribed sequences                                                                   | <a href="#">IMAGE:266631</a>  |
| 226045    LOC90557    hypothetical protein BC016861                                                               | <a href="#">IMAGE:590310</a>  |
| 222446    PACE4    paired basic amino acid cleaving system 4                                                      | <a href="#">IMAGE:435718</a>  |
| 101636    SLC39A6    solute carrier family 39 (zinc transporter), member 6                                        | <a href="#">IMAGE:52933</a>   |
| 103482    PKIB    protein kinase (cAMP-dependent, catalytic) inhibitor beta                                       | <a href="#">IMAGE:152289</a>  |
| 224616    ABCC8    ATP-binding cassette, sub-family C (CFTR/MRP), member 8                                        | <a href="#">IMAGE:1558108</a> |
| 108925    FLJ25429    hypothetical protein FLJ25429                                                               | <a href="#">IMAGE:124239</a>  |
| 331200    LRP2    low density lipoprotein-related protein 2                                                       | <a href="#">IMAGE:2464693</a> |
| 100957    RGS5    regulator of G-protein signalling 5                                                             | <a href="#">IMAGE:853809</a>  |
| 117713       Homo sapiens cDNA FLJ12935 fis, clone NT2RP2004982.                                                  | <a href="#">IMAGE:32962</a>   |
| 309209       Homo sapiens transcribed sequence with strong similarity to protein ref:NP_079038.1 (H.sapiens) hyp  | <a href="#">IMAGE:1632235</a> |
| 246144                                                                                                            | <a href="#">IMAGE:26883</a>   |
| 118812    MGC18216    hypothetical protein MGC18216                                                               | <a href="#">IMAGE:220069</a>  |
| 225175       Homo sapiens cDNA FLJ42585 fis, clone BRACE3009237                                                   | <a href="#">IMAGE:845037</a>  |
| 114914    PLAT    plasminogen activator, tissue                                                                   | <a href="#">IMAGE:813841</a>  |
| 101421       Homo sapiens mRNA full length insert cDNA clone EUROIMAGE 980547                                     | <a href="#">IMAGE:232860</a>  |
| 311752    STATIP1    signal transducer and activator of transcription 3 interacting protein 1                     | <a href="#">IMAGE:1686600</a> |
| 114743    GLRB    glycine receptor, beta                                                                          | <a href="#">IMAGE:810618</a>  |
| 116038    IL6ST    interleukin 6 signal transducer (gp130, oncostatin M receptor)                                 | <a href="#">IMAGE:753743</a>  |
| 330278    IGF1R    insulin-like growth factor 1 receptor                                                          | <a href="#">IMAGE:2488804</a> |
| 119736    LOC222171    hypothetical protein LOC222171                                                             | <a href="#">IMAGE:924741</a>  |
| 116219    GATA3    GATA binding protein 3                                                                         | <a href="#">IMAGE:214068</a>  |
| 100840    C6orf211    chromosome 6 open reading frame 211                                                         | <a href="#">IMAGE:785795</a>  |
| 101511    ACOX2    acyl-Coenzyme A oxidase 2, branched chain                                                      | <a href="#">IMAGE:85450</a>   |
| 221470    ACACB    acetyl-Coenzyme A carboxylase beta                                                             | <a href="#">IMAGE:1635307</a> |
| 319669       Homo sapiens cDNA: FLJ22066 fis, clone HEP10611                                                      | <a href="#">IMAGE:207274</a>  |
| 98556    SLC1A2    solute carrier family 1 (glial high affinity glutamate transporter), member 2                  | <a href="#">IMAGE:52990</a>   |
| 103089       Homo sapiens transcribed sequences                                                                   | <a href="#">IMAGE:1557637</a> |
| 118262       **Homo sapiens transcribed sequence with strong similarity to protein ref:NP_079038.1 (H.sapiens) hy | <a href="#">IMAGE:66400</a>   |
| 117245    HPN    hepsin (transmembrane protease, serine 1)                                                        | <a href="#">IMAGE:208413</a>  |
| 311521    SEC14L2    SEC14-like 2 (S. cerevisiae)                                                                 | <a href="#">IMAGE:2019750</a> |
| 109558    NPY1R    neuropeptide Y receptor Y1                                                                     | <a href="#">IMAGE:33045</a>   |
| 313631    TSPAN-1    tetraspan 1                                                                                  | <a href="#">IMAGE:2320932</a> |
| 119404    SOX17    SRY (sex determining region Y)-box 17                                                          | <a href="#">IMAGE:742062</a>  |
| 106610    DACH    dachshund homolog (Drosophila)                                                                  | <a href="#">IMAGE:132326</a>  |
| 106139    GSTM2    glutathione S-transferase M2 (muscle)                                                          | <a href="#">IMAGE:713922</a>  |
| 308499    CHN2    chimerin (chimaerin) 2                                                                          | <a href="#">IMAGE:1526036</a> |
| 116211    ELN    elastin (supraaortic stenosis, Williams-Beuren syndrome)                                         | <a href="#">IMAGE:810934</a>  |
| 101842    APXL2    apical protein 2                                                                               | <a href="#">IMAGE:281681</a>  |
| 239150    PACE4    **paired basic amino acid cleaving system 4                                                    | <a href="#">IMAGE:415962</a>  |
